# Supplementary material for: Will children reveal their secret? The coronavirus dilemma
Source: PubMed Central journal article supplement — Eur Respir J. 2020 Jun 25;55(6):2001617. doi: 10.1183/13993003.01617-2020 (PMC7241107; doi:10.1183/13993003.01617-2020), 2020-06-25
Supplement: ERJ-01617-2020.Shareable.pdf [file ERJ-01617-2020.Shareable.pdf]

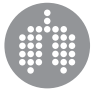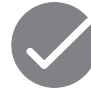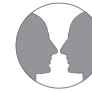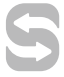

SHAREABLE PDF

# Will children reveal their secret? The coronavirus dilemma

Fabio Midulla, Luca Cristiani and Enrica Mancino

**Affiliation:** Dept of Maternal Science, Paediatric Emergency Service, Sapienza University of Rome, Rome, Italy.

**Correspondence:** Fabio Midulla, University of Rome, Cystic Fibrosis, V.le Regina Elena, 324, Rome 00161, Italy. E-mail: midulla@uniroma1.it

 @ERSpublications  
**The role of ACE2 receptor in SARS-CoV-2 infection and in COVID-19 outcomes is still debated, especially in children** <https://bit.ly/35ZLf7V>

**Cite this article as:** Midulla F, Cristiani L, Mancino E, *et al.* Will children reveal their secret? The coronavirus dilemma. *Eur Respir J* 2020; 55: 2001617 [<https://doi.org/10.1183/13993003.01617-2020>].

This single-page version can be shared freely online.

## *From the authors:*

We thank G.J. Porter for his comments on our recently published editorial: “Will children reveal their secret? The coronavirus dilemma” [1]. In the editorial, we reviewed some of the strongest evidence that may support our perspective. It was beyond the purpose of our manuscript to provide a full description of the renin–angiotensin–aldosterone system (RAAS) and angiotensin-converting enzyme 2 (ACE2) receptor. We strongly agree that evidence about the role of ACE2 in severe acute respiratory syndrome coronavirus 2 (SARS-CoV-2) infection is conflicting and our putative perspective was clearly pointed out in the paper. The debate around the role of ACE2 in SARS-CoV-2 infection is ongoing and we appreciate the chance that G.J. Porter has given us to better elucidate some of its main aspects.
